# Supplementary material
Source: publisher site journal article supplement (https://www.dovepress.com/article/286274)
Supplement: Supplementary file 1 [file get_supplementary_file.php]

**Supplementary Figures and Figure legends**

**Figure S1**
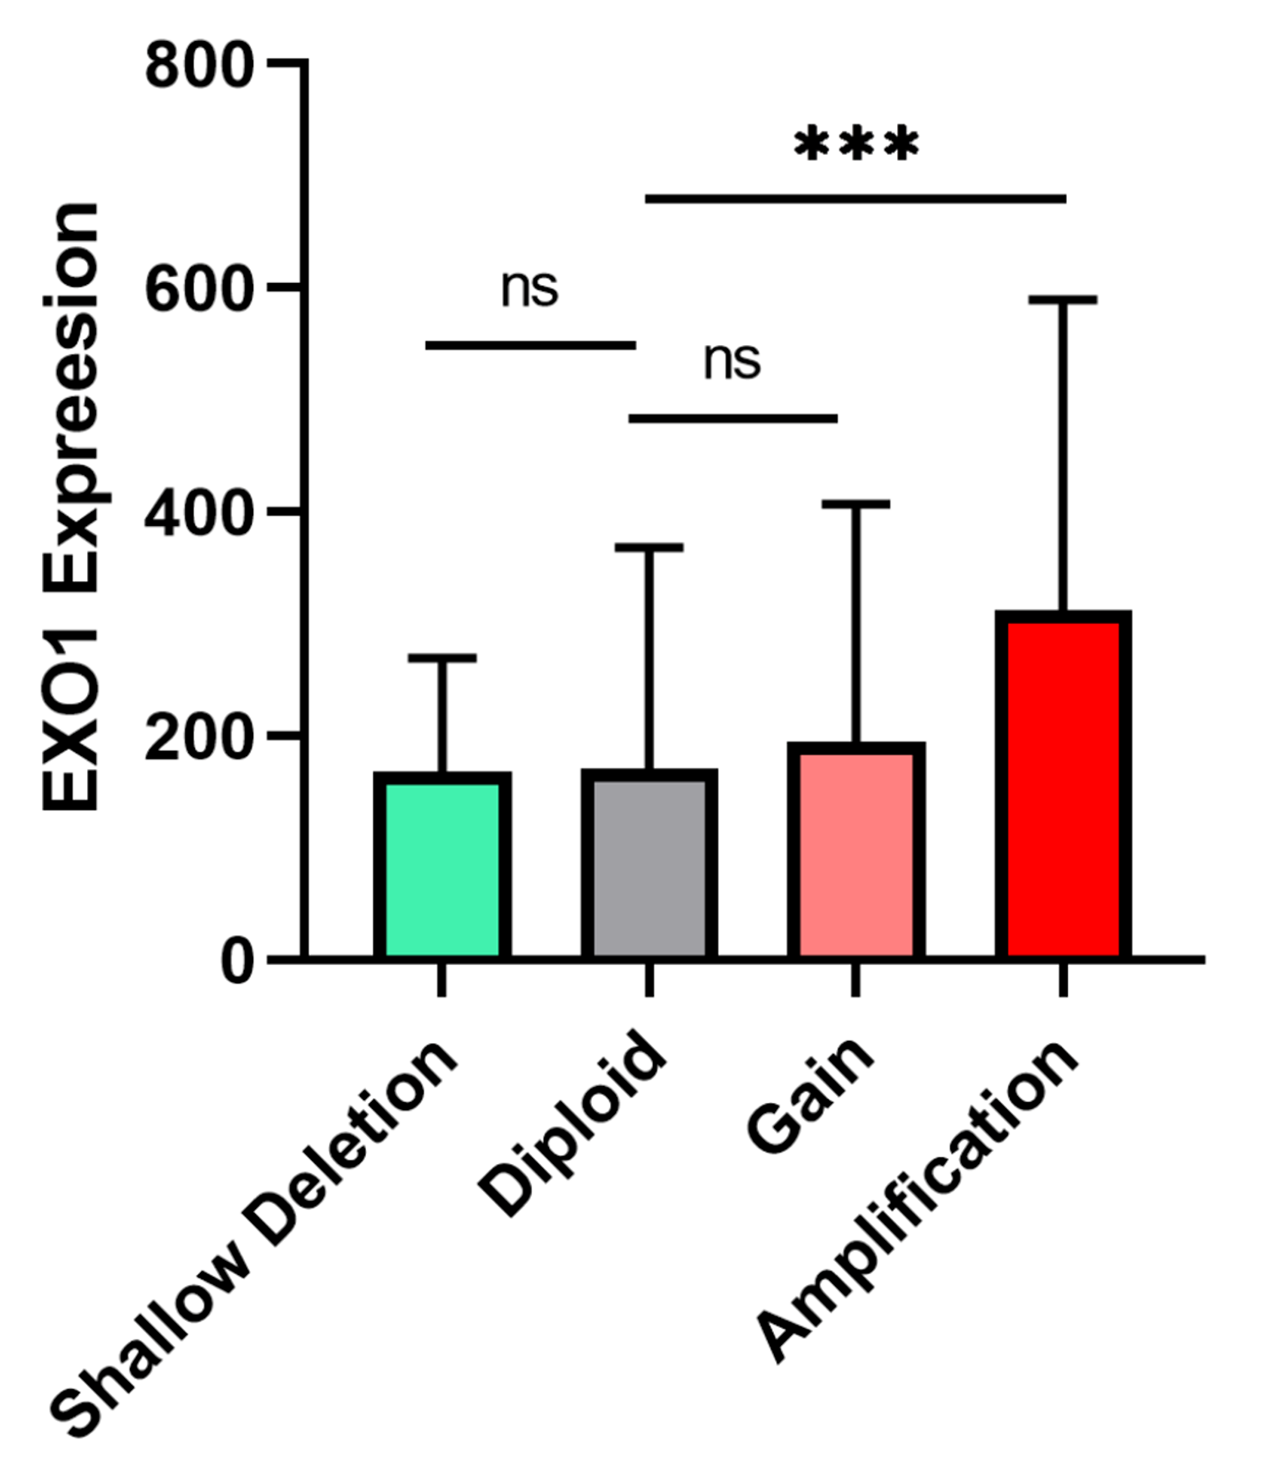


**Figure S1. Genetic alterations of EXO1 in 483 cases of LUAD.** Amplification was the most common type of EXO1 genetic alterations in LUAD. ***, *p*<0.001. *p* < 0.05 was considered to be significant.

**Figure S2**


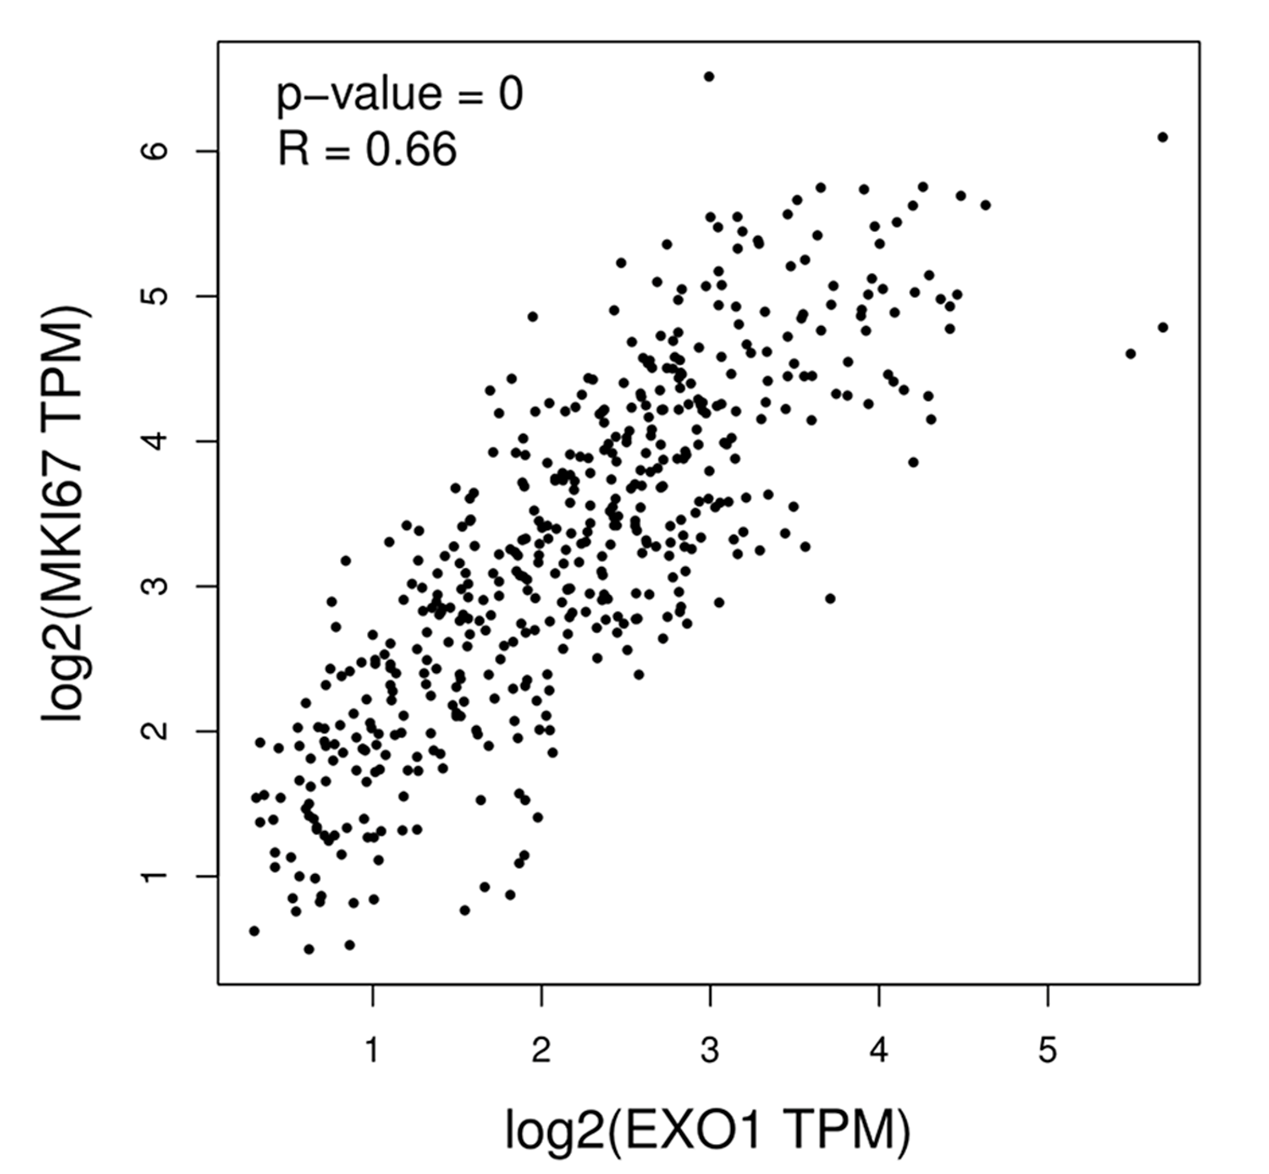


**Figure S2. Correlation analysis of** **Ki-67 and EXO1 in LUAD from TCGA.**

EXO1 was positively correlated with Ki-67 at the mRNA expression level based on TCGA (R=0.6, *p*=0.00). *p* < 0.05 was considered to be significant.

**Figure S3**


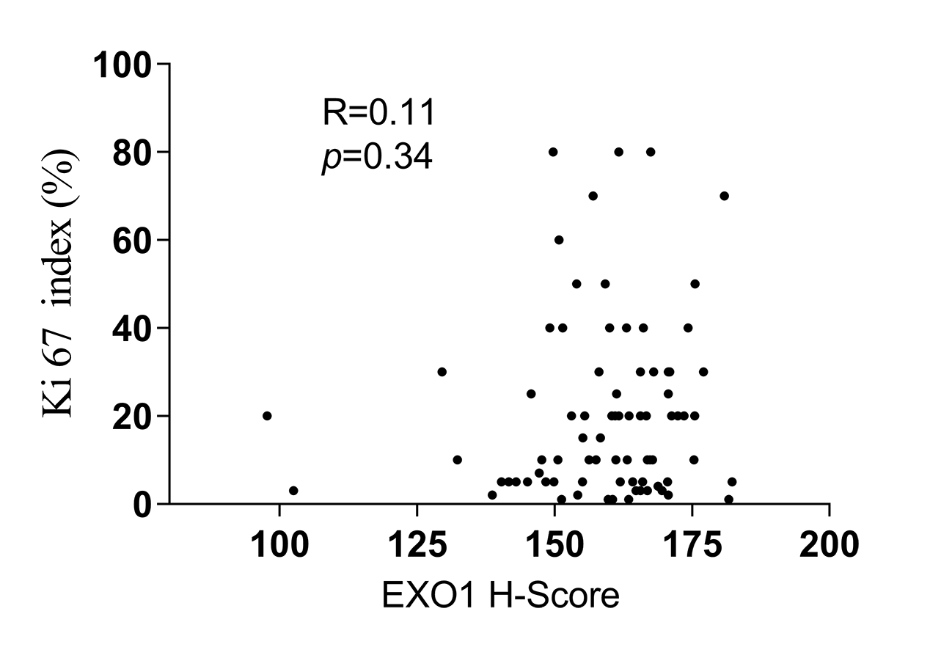


**Figure S3. Correlation analysis of Ki-67 index and EXO1 protein expression in LUAD from our cohort.**

The positive correlation between EXO1 H-score and Ki-67 index in our cohort was not significant (R=0.11, *p*=0.34). *p* < 0.05 was considered to be significant.

**Supplementary tables**

**Table S1. Baseline features of 78 LUAD patients in our own cohort**

| Clinicopathological features | |  | number |
| --- | --- | --- | --- |
| Age(years) |  | | 46.00 ± 8.57 |
| Female |  | | 39(50.00%) |
| T stage |  | |  |
| T1 |  | | 55(70.51%) |
| T2 |  | | 16(20.51%) |
| T3-4 |  | | 7(8.97%) |
| N stage |  | |  |
| N0 |  | | 36(46.15%) |
| N1-3 |  | | 42(53.85%) |
| M stage |  | |  |
| M0 |  | | 55(70.51%) |
| M1 |  | | 23(29.49%) |
| AJCC stage |  | |  |
| Ⅰ |  | | 24(30.77%) |
| Ⅱ |  | | 20(25.64%) |
| Ⅲ |  | | 11(14.1%) |
| Ⅳ |  | | 23(29.49%) |
| Histological grade |  | |  |
| Ⅰ |  | | 15(19.23%) |
| Ⅱ |  | | 28(35.9%) |
| Ⅲ |  | | 35(44.87%) |
| Tumor diameter |  | |  |
| <3cm |  | | 45(57.69%) |
| ≥3cm |  | | 33(42.31%) |
| Ki-67 index |  | |  |
|  | <10% | | 30(38.46%) |
|  | ≥10% | | 48(61.54%) |

AJCC, American Joint Committee on cancer.

**Table S2. Baseline features of LUAD patients in public databases.**

| Clinicopathological features | GEO (n = 226) | TCGA (n = 510) |
| --- | --- | --- |
| Age(years) | 59.58 ± 7.40 | 65.25 ± 9.99 |
| Female | 121(53.54%) | 276(53.70%) |
| T stage |  |  |
| T1 | 168(74.34%) | 168(32.94%) |
| T2 | 58(25.66%) | 276(54.12%) |
| T3-4 | n | 66(12.94%) |
| N stage |  |  |
| N0 | n | 330a |
| N1-3 | n | 171 a |
| M stage |  |  |
| M0 | n | 344a |
| M1 | n | 25 a |

n, not containing clinical parameter a lack of relevant clinical information in part patients.
